# Supplementary material
Source: Research Square preprint supplement (doi:10.21203/rs.3.rs-9002280/v1)
Supplement: Supplementary file 1 [file fd00e210c168822334f91992.docx]

**Supplementary Materials**

1. **Description of DuEM model**

The DuEM model, developed by Wu et al1 based on Shao's2 physical dust emission framework, is an East Asia-specific dust emission model. Its input variables include surface wind speed, soil moisture, vegetation cover, and snow cover, among others. Generally follows the framework of Shao2, and based on the following assumptions: 1.The horizontal saltation flux is proportional to the cube of the friction velocity. When the friction velocity exceeds the critical friction velocity, soil particle saltation begins to occur, and the critical friction velocity increases due to the influence of soil moisture and surface roughness factors. Based on the soil volume removed by saltation particles and the binding strength between soil particles, calculate the saltation efficiency, which is the ratio of vertical dust flux to horizontal saltation flux. 2.Vertical dust emission is predominantly driven by two physical mechanisms: splash bombardment during saltation and aggregate disintegration of soil clusters. 3. Dust emission is restricted to bare soil surfaces, by excluding non-wind-eroded surfaces such as snow, vegetation, and water bodies. The model performs well in comparison with field observation data and has been widely used in sand and dust simulation studies at regional3,4 and global scales 5,6. The model details and calculation formulas are as follows:

（i）The horizontal saltation flux *Q(ds)* of sand grains with size ds is calculated as follows：

(1)

In this equation, *C0* is a coefficient with an initial value of 2.6, typically taken as 1.01. *ρa* represents the air density, g is the gravitational acceleration, *u∗* is the wind speed, and *u*t* is the threshold friction velocity, calculated as follows:

(2)

is the ideal threshold friction velocity under dry, bare soil conditions, while *f(λ)* and *f(w)* are correction functions based on surface roughness *λ* and soil moisture w, as detailed below.

(3)

(4)

(5)

(6)

*a1* and *b1* are dimensionless parameters. According to the experimental results by7, their values are 0.0123 and 3×10 -4 kg·s -2,represents the density of the sand particles. λ is the characteristic length of the surface roughness elements, σ is the dust impact efficiency, β is a parameter related to surface roughness. Previous studies8 suggest that their values should be *σ* ≈ 1, *β* ≈ 90, and *m* ≈ 0.5. *λ* is a key parameter that describes the geometric characteristics of surface roughness elements (mainly vegetation), derived empirically from the leaf area index (LAI),depends on vegetation characteristics, typically taking a value of 1. *asoil* and *bsoil* are coefficients related to soil type, *wr* is the critical moisture value of the soil, which is a function of the clay content, can be found in Table S1.

Table S1 The soil moisture correction values a, b, and wr for different soil types.9

|  | Sand | Loamy  Sand | Sandy  Loam | Loam | Silt  Loam | Sandy Clay  Loam | Clay  Loam | | Silty Clay  Loam | Sandy  Clay | Silty Clay | Clay | Heavy Clay |
| --- | --- | --- | --- | --- | --- | --- | --- | --- | --- | --- | --- | --- | --- |
| a | 21.19 | 30.00 | 44.87 | 17.79 | 21.79 | 25.79 | 29.86 | 27.50 | | 25.20 | 22.90 | 20.47 | 20.47 |
| b | 0.68 | 0.90 | 0.85 | 0.61 | 0.67 | 0.74 | 0.80 | 0.75 | | 0.70 | 0.65 | 0.59 | 0.54 |
| wr | 0.005 | 0.010 | 0.037 | 0.049 | 0.059 | 0.075 | 0.095 | 0.110 | | 0.125 | 0.140 | 0.156 | 0.171 |

（ii）The dust emission calculation caused by rotational impact in the model is primarily based on the following: assume that soil particles are divided into I size intervals, with the average diameter of each interval being di(m) and the increment being. The emission flux of dust particles generated by the rotational impact of particles with size di(m) and *F(di,ds)*（kg·m-2·s -1）for the i group can be expressed as:

(7)

(8)

(9)

is a dimensionless coefficient, is the portion of dust in the i-th group that can be emitted, and are the particle size distributions for the minimum (original) and fully disturbed states, respectively. Q(*ds*) is the horizontal saltation flux for sand particles of size ds, is the dust bombardment efficiency, *p* is the soil plastic pressure (Pa).

The total emission flux of the i group of dust particles from all rotating particles (with sizes ranging from d1 to d2) is:

(10)

The actual particle size distribution p(d) is calculated using the following formula:

(11)

（3）The formula for calculating the total dust emission flux is:

(12)

(13)

*fsnow* represents snow cover, and fc represents vegetation cover. *LAIc*,the critical *LAI*, is set to 0.3 m2·m-2 following10

1.
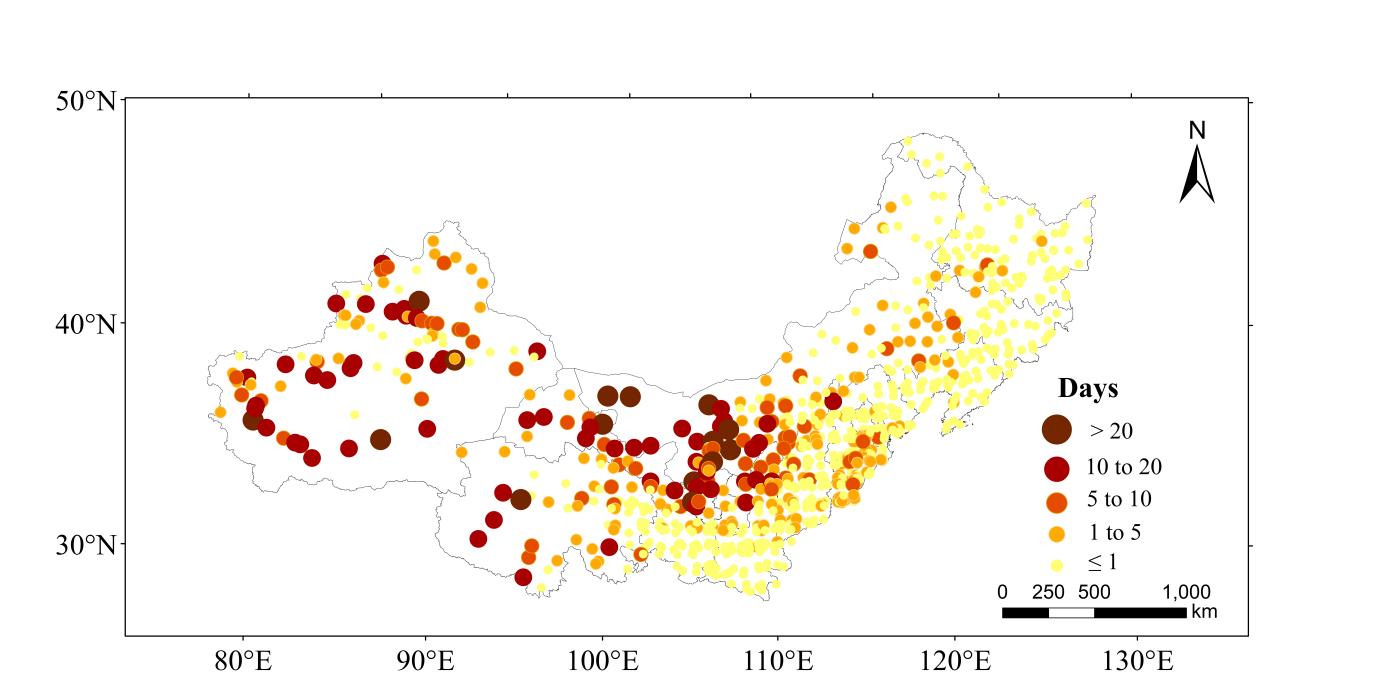
**Supplementary Figures**

Figure S1 Spatial distribution of dust storm frequency (in days) in 1982


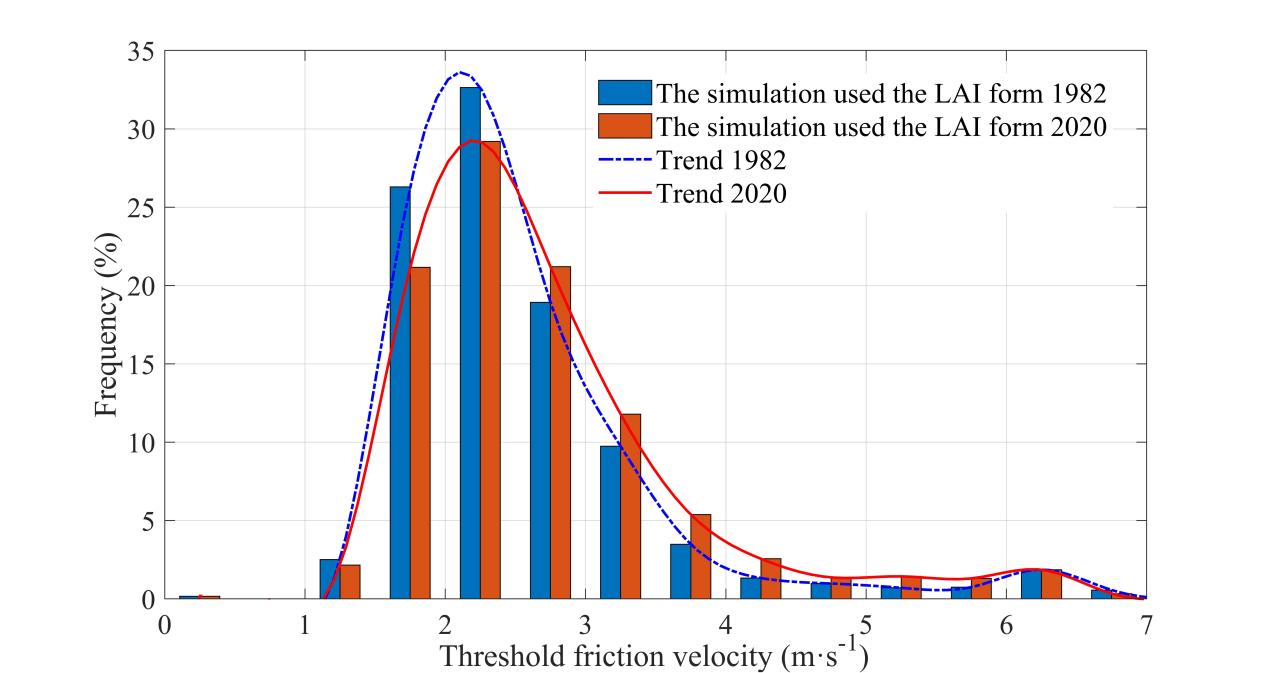


Figure S2 Frequency distribution of the threshold friction velocity in 1982 and 2020 LAI scenarios. The threshold friction velocity was divided into 14 consecutive bins, each with a width of 0.5 m·s-1.

**References**

1. Wu, C., Lin, Z., Shao, Y., Liu, X. & Li, Y. Drivers of recent decline in dust activity over East Asia. *Nat. Commun.* **13**, (2022).

2. Shao, Y. Simplification of a dust emission scheme and comparison with data. *Journal of Geophysical Research: Atmospheres*. **109**, 2003JD004372 (2004).

3. Kang, J. Y., Yoon, S. C., Shao, Y. & Kim, S. W. Comparison of vertical dust flux by implementing three dust emission schemes in WRF/Chem. *Journal of Geophysical Research Atmospheres*. **116**, (2011).

4. Hamidi, M., Kavianpour, M. R. & Shao, Y. Numerical simulation of dust events in the Middle East. *Aeolian Res.* **13**, 59-70 (2014).

5. Klose, M. et al. Mineral dust cycle in the Multiscale Online Nonhydrostatic AtmospheRe CHemistry model (MONARCH) Version 2.0. *Geosci. Model Dev.* **14**, 6403-6444 (2021).

6. Wu, C. et al. Description of Dust Emission Parameterization in CAS‐ESM2 and Its Simulation of Global Dust Cycle and East Asian Dust Events. *J. Adv. Model. Earth Syst.* **13**, (2021).

7. Shao, Y. & Lu, H. A simple expression for wind erosion threshold friction velocity. *Journal of Geophysical Research Atmospheres*. **105**, 22437-22443 (2000).

8. Raupach, M. R., Gillette, D. A. & Leys, J. F. The effect of roughness elements on wind erosion threshold. *Journal of Geophysical Research Atmospheres*. **98**, 3023-3029 (1993).

9. Kang, J., Yoon, S., Shao, Y. & Kim, S. Comparison of vertical dust flux by implementing three dust emission schemes in WRF/Chem. *Journal of Geophysical Research*. **116**, (2011).

10. Mahowald et al. Observed 20th century desert dust variability: impact on climate and biogeochemistry., (2010).
